# Supplementary material
Source: PubMed Central journal article supplement (PMC2575478)
Supplement: 0808081105_0808081105SI.pdf [file 0808081105_0808081105SI.pdf]

# Supporting Information

Košmrlj *et al.* 10.1073/pnas.0808081105

## SI Text

**Linear Free-Energy Relationships.** The relationship between the change in free energy at equilibrium (related to affinity) and the free-energy barrier for the reaction to occur (related to off-rate) for a set of related reactions has been studied extensively. Reactions are considered related if the change from one reaction to another is a change in some moieties that does not change the class of reactions (e.g., reactions of amines ( $-\text{RNH}_2$ ) with an acid and varying R groups). For related reactions, the free-energy surfaces usually do not intersect. As such, if the equilibrium free-energy change is larger for one reaction compared with another, then so is the free-energy barrier. Thus, the reaction with the higher affinity will also have a lower off-rate. These relationships are called linear free-energy relationships (1, 2).

**Results for Cases Where the Gap Between the Positive and Negative Selection Thresholds Is Large, and TCR-MHC Interactions Are Weak.** If TCR-MHC interactions are weak and  $E_p$  and  $E_N$  were separated by a large gap, regardless of the number of peptides in the thymus, almost all preselection TCRs characterized by weak TCR-MHC interactions ( $E_c$ ) would be positively selected, and almost none would be negatively selected (Table S2). This contradicts the fact that very few T cells are positively selected (3–8). Our calculations also show that, for this situation, TCRs selected against 1 or 10,000 types of pMHC in the thymus display many hot spots vis-à-vis recognition of antigenic peptides (Fig. S8), a result contradicting observations (9, 10). The origin of this result is that, in this case, positive selection determines TCR sequences. Positive selection requires only that a TCR interact with any one pMHC molecule with energy greater than  $E_p$ , making selection against one or many pMHC complexes have similar consequences. For these reasons, we do not consider this situation.

**Probability that a TCR Will Escape Negative Selection.** The probability ( $P$ ) that a TCR characterized by a sequence of peptide contact residues composed of a set of amino acids,  $\{l_1, l_2, l_3, \dots\}$ , denoted by  $\vec{l}$ , is not negatively selected can be written as:

$$P(\vec{l}) = \prod_{j=1}^M [1 - \theta(E(\vec{l}, \vec{j}) - E_N)] p(\vec{j}), \quad [1]$$

where  $M$  is the number of peptides in the thymus,  $E(\vec{l}, \vec{j})$  is the interaction energy between the TCR and a peptide composed of a sequence of amino acids, denoted by  $\vec{j}$ . The absolute values of this interaction energy and  $E_N$  are used in Eq. 1. The step function,  $\theta$ , is used to represent the sharply defined negative selection threshold, and  $p(\vec{j})$  is the probability of finding a peptide characterized by the amino acid sequence  $\vec{j}$  in the thymus. Because the probability  $P$  that a particular TCR escapes the

negative-selection process is the product of the probabilities to escape  $M$  encountered peptides, we can alternatively write:

$$P(\vec{l}) = \exp \left\{ \sum_{j=1}^M [\ln p(\vec{j}) + \ln(1 - \theta(E(\vec{l}, \vec{j}) - E_N))] \right\} \\ \approx \exp \{ M \langle \ln p(\vec{j}) \rangle + M \langle \ln[1 - \theta(E(\vec{l}, \vec{j}) - E_N)] \rangle \}. \quad [2]$$

The approximation rests on the reasonable assumption that the sum of logarithms of the individual escape probabilities is a self-averaging quantity and should be valid in the limit of large  $M$ . The first factor in the exponent is related to the entropy of the probability distribution of finding peptides in the thymus and is independent of TCR sequence  $\vec{l}$ ; the second factor restricts the choice of sequence of the peptides that escape negative selection, i.e.:

$$P(\vec{l}) \propto \exp \{ M \langle \ln[1 - \theta(E(\vec{l}, \vec{j}) - E_N)] \rangle \}. \quad [3]$$

It is hard to evaluate averages by using step function, but we can approximate the step function with the following smooth function

$$1 - \theta(\Delta E) \approx \exp[-e^{b\Delta E}], \quad [4]$$

where  $b$  is a positive constant. Note that when  $\Delta E$  is negative,  $e^{b\Delta E}$  is  $\approx 0$ , whose exponential is roughly unity, whereas if  $\Delta E$  is positive,  $e^{b\Delta E}$  is a large positive number, whose exponential is  $\approx 0$ . How sharply the change from 0 to 1 occurs as  $\Delta E$  changes from negative to positive can be controlled by changing the constant  $b$ , and a sharp cutoff is obtained for  $b \rightarrow \infty$ .

With this approximation, and noting that  $\Delta E$  is the sum of  $N$  contributions, where  $N$  is peptide length, we find:

$$\langle \ln[1 - \theta(E(\vec{l}, \vec{j}) - E_N)] \rangle \approx - \langle e^{\sum_{i=1}^N b[J(l_i, j_i) - E_N/N]} \rangle \\ = - \prod_{i=1}^N \left\langle \exp \left[ b \left( J(l_i, j_i) - \frac{E_N}{N} \right) \right] \right\rangle = - \prod_{i=1}^N \sum_{j=1}^{20} h_{ij}, \quad [5]$$

where

$$h_{ij} = p_j \exp \left[ b \left( J(l_i, j) - \frac{E_N}{N} \right) \right], \quad [6]$$

and  $p_j$  is the frequency with which amino acid  $j$  occurs. We were able to take the averaging operation inside the product, by assuming that the sites are independent. The expression for the probability that a particular TCR sequence escapes negative selection then takes the form

$$P(\vec{l}) \propto \exp \left\{ -M \prod_{i=1}^N \sum_{j=1}^{20} h_{ij} \right\}. \quad [7]$$

- Swain CG, Scott CB (1953) Quantitative Correlation of Relative Rates. Comparison of Hydroxide Ion with Other Nucleophilic Reagents toward Alkyl Halides, Esters, Epoxides and Acyl Halides. *J Am Chem Soc* 75:141–147.
- Edwards JO (1954) Correlation of Relative Rates and Equilibria with a Double Basicity Scale. *J Am Chem Soc* 76:1540–1547.
- Detours V, Perelson AS (1999) Explaining high alloreactivity as a quantitative consequence of affinity-driven thymocyte selection. *Proc Natl Acad Sci USA* 96:5153–5158.
- vanMeerwijk JPM, *et al.* (1997) Quantitative impact of thymic clonal deletion on the T cell repertoire. *J Exp Med* 185:377–383.

- Egerton M, Scollay R, Shortman K (1990) Kinetics of mature T cell development in the thymus. *Proc Natl Acad Sci USA* 87:2579–2582.
- Scollay RG, Butcher EC, Weissman IL (1980) Thymus-cell migration quantitative aspects of cellular traffic from the thymus to the periphery in mice. *Eur J Immunol* 10:210–218.
- Shortman K, Vremec D, Egerton M (1991) The kinetics of T-cell antigen receptor expression by subgroups of Cd4+8+ thymocytes—Delineation of Cd4+8+32+ thymocytes as post-selection intermediates leading to mature T-cells. *J Exp Med* 173:323–332.

8. Merckenschlager M, et al. (1997) How many thymocytes audition for selection? *J Exp Med* 186:1149–1158.
9. Huseby ES, et al. (2006) Interface-disrupting amino acids establish specificity between T cell receptors and complexes of major histocompatibility complex and peptide. *Nat Immunol* 7:1191–9.
10. Huseby ES, et al. (2005) How the T cell repertoire becomes peptide and MHC specific. *Cell* 122:247–260.
11. Miyazawa S, Jernigan RL (1996) Residue-residue potentials with a favorable contact pair term and an unfavorable high packing density term, for simulation and threading. *J Mol Biol* 256:623–644.
12. Zeldovich KB, Berezovsky IN, Shakhnovich EI (2007) Protein and DNA sequence determinants of thermophilic adaptation. *PLoS Comput Biol* 3:62–72.



















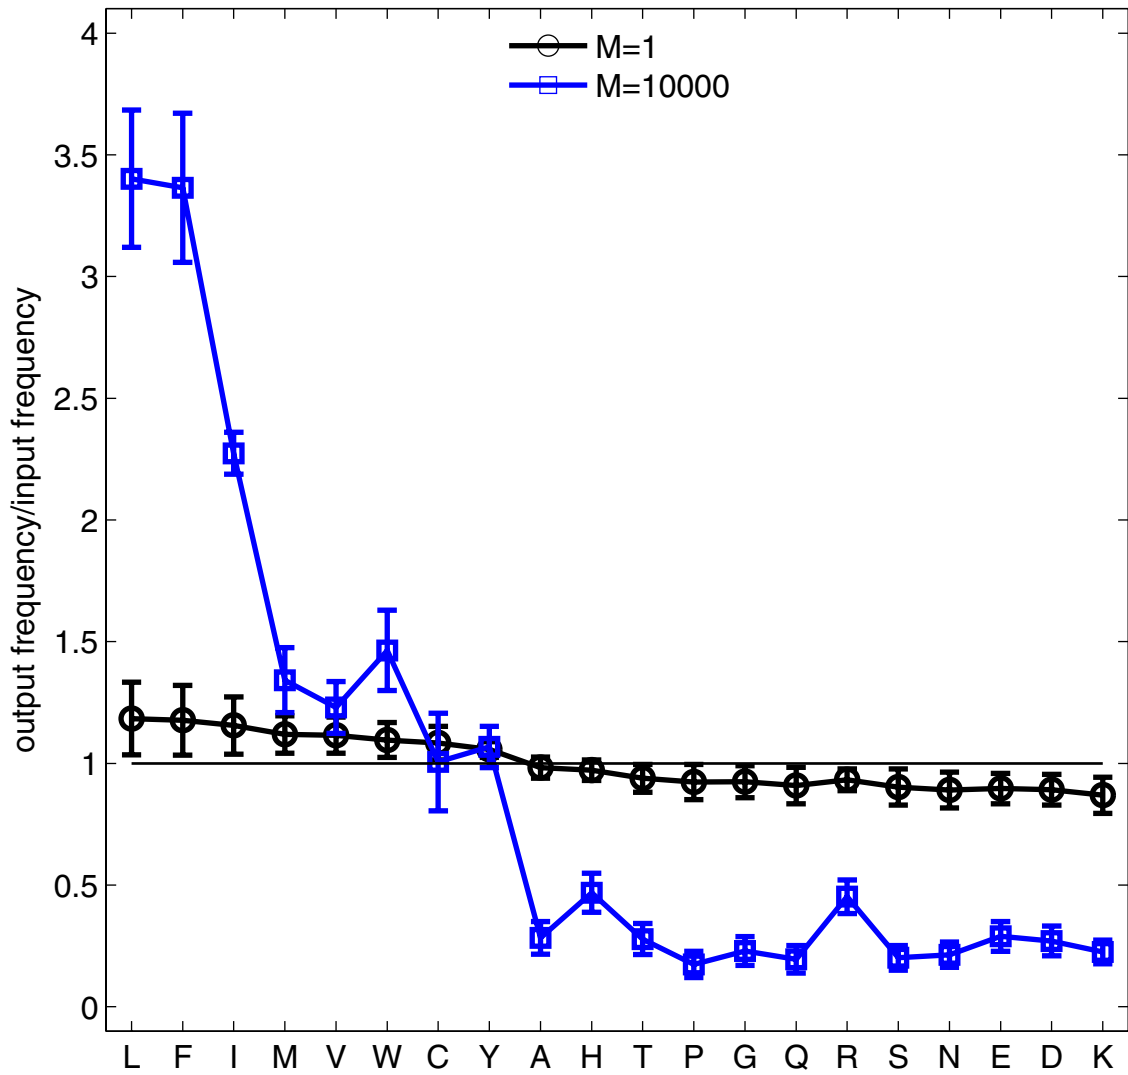

**Fig. S7.** Amino acid frequencies of recognized antigenic peptides. Depicted is the ratio of amino acid frequencies of reactive antigenic peptides, defined as those that are recognized by at least one of the selected TCRs with respect to amino acid frequencies of all antigenic peptides (*Listeria monocytogenes*). The black curve depicts the results for TCRs selected against one self-peptide, whereas the blue curve corresponds to selection against many self-peptides ( $M = 10,000$ ). For TCRs selected against many self-peptides, the reactive antigens are composed of more strong amino acids. The amino acids on the abscissa are ordered from strongest (L) to weakest (K) according to the strongest interaction with another amino acid in the MJ matrix. ( $E_N - E_C = 40 k_B T$ ,  $E_N - E_D = 5 k_B T$ ).

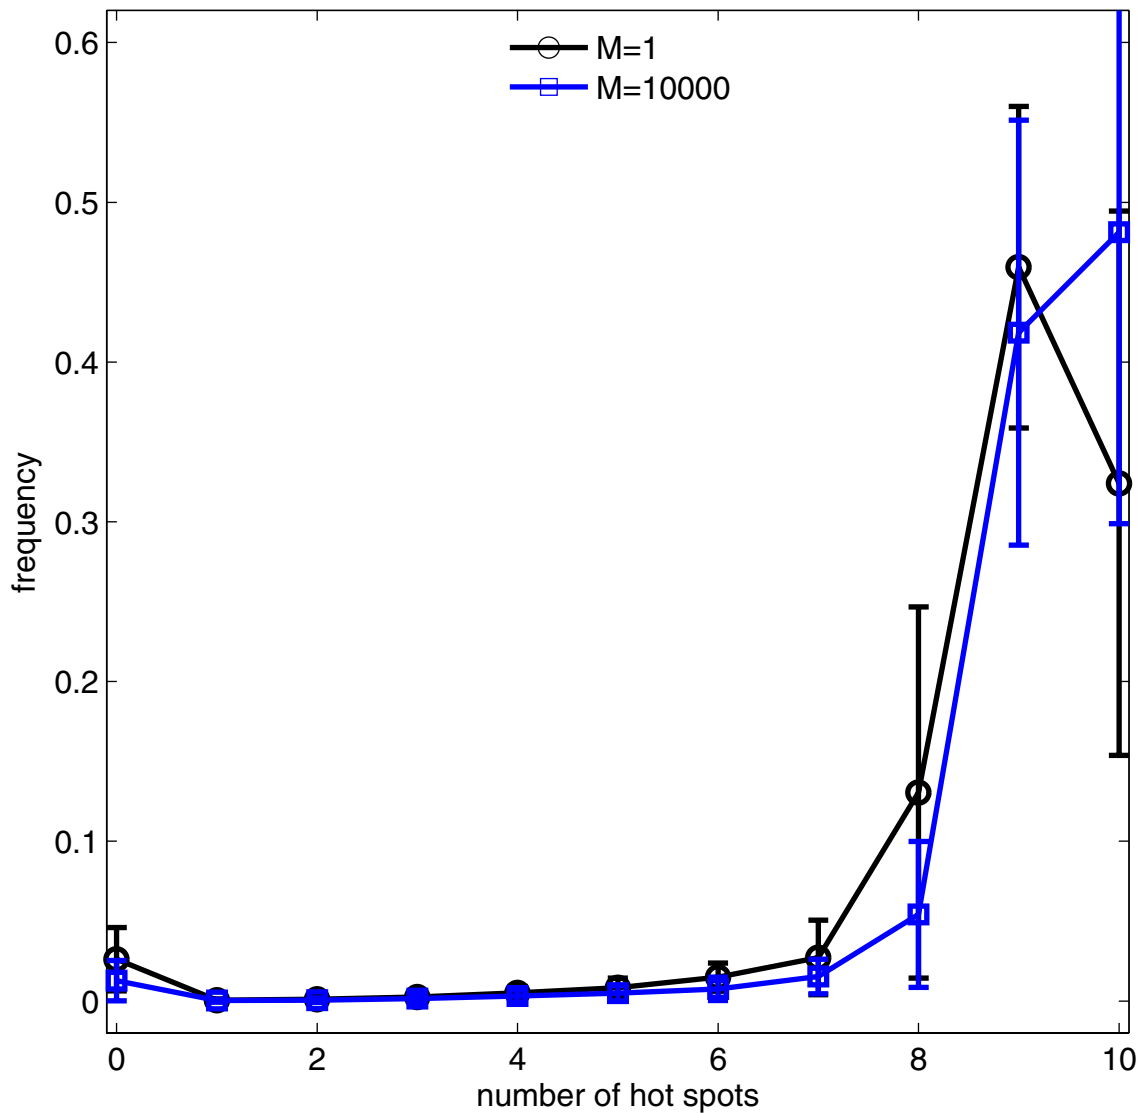

**Fig. S8.** Distribution of hot spots for small value of  $E_c$  (weak TCR–MHC interactions) and large gap,  $E_N - E_p$ . When interactions between TCRs and MHC are weak ( $E_N - E_c = 60 k_B T$ ) and the gap between negative and positive selection thresholds ( $E_N - E_p = 30 k_B T$ ) is large, the distribution of the number of hot spots shows a peak at large values for TCRs selected in thymus both against one self-peptide (black curve) and against many self-peptides (blue curve,  $M = 10,000$ ).

**Table S1. Amino acid frequencies of *Homo sapiens*, mouse and *Listeria monocytogenes* proteomes**

|   | <i>Homo sapiens</i> | <i>Mus musculus</i><br>(house mouse) | <i>Listeria monocytogenes</i> |
|---|---------------------|--------------------------------------|-------------------------------|
| A | 0.0692              | 0.0681                               | 0.0774                        |
| C | 0.0225              | 0.0228                               | 0.0061                        |
| D | 0.0476              | 0.0481                               | 0.0544                        |
| E | 0.0718              | 0.0700                               | 0.0744                        |
| F | 0.0359              | 0.0369                               | 0.0453                        |
| G | 0.0658              | 0.0641                               | 0.0667                        |
| H | 0.0261              | 0.0263                               | 0.0178                        |
| I | 0.0434              | 0.0439                               | 0.0784                        |
| K | 0.0576              | 0.0576                               | 0.0716                        |
| L | 0.0985              | 0.0993                               | 0.0951                        |
| M | 0.0215              | 0.0221                               | 0.0275                        |
| N | 0.0360              | 0.0358                               | 0.0462                        |
| P | 0.0636              | 0.0619                               | 0.0347                        |
| Q | 0.0481              | 0.0479                               | 0.0346                        |
| R | 0.0568              | 0.0563                               | 0.0365                        |
| S | 0.0836              | 0.0850                               | 0.0580                        |
| T | 0.0536              | 0.0541                               | 0.0611                        |
| V | 0.0598              | 0.0609                               | 0.0704                        |
| W | 0.0123              | 0.0120                               | 0.0093                        |
| Y | 0.0263              | 0.0269                               | 0.0345                        |

**Table S2. TCR selection probabilities**

| Weak TCR–MHC interactions (small value of $E_c$ , $E_N - E_c > 55 k_B T$ )                                                                                                               |                                                                                                                                                                                                                                       | Strong TCR–MHC interactions (large value of $E_c$ , $E_N - E_c < 35 k_B T$ )                                              |                                                                                                                           |
|------------------------------------------------------------------------------------------------------------------------------------------------------------------------------------------|---------------------------------------------------------------------------------------------------------------------------------------------------------------------------------------------------------------------------------------|---------------------------------------------------------------------------------------------------------------------------|---------------------------------------------------------------------------------------------------------------------------|
| Small gap between selection thresholds ( $E_N - E_p \leq 5 k_B T$ )                                                                                                                      | Large gap between selection thresholds ( $E_N - E_p > 20 k_B T$ )                                                                                                                                                                     | Small gap between selection thresholds ( $E_N - E_p \leq 5 k_B T$ )                                                       | Large gap between selection thresholds ( $E_N - E_p > 20 k_B T$ )                                                         |
| Very few TCRs are positively selected in thymus, e.g. $\approx 0.02\%$ are negatively selected and $\approx 0.5\%$ positively selected at $E_N - E_c = 60 k_B T$ , $E_N - E_p = 5 k_B T$ | Almost all TCRs are positively selected and very few TCRs are negatively selected in thymus, e.g. $\approx 0.02\%$ are negatively selected and $\approx 100\%$ positively selected at $E_N - E_c = 60 k_B T$ , $E_N - E_p = 30 k_B T$ | Almost all TCRs are negatively selected in thymus, e.g. $\approx 100\%$ are negatively selected at $E_N - E_c = 30 k_B T$ | Almost all TCRs are negatively selected in thymus, e.g. $\approx 100\%$ are negatively selected at $E_N - E_c = 30 k_B T$ |

Fraction of selected TCRs for different values of parameters  $E_c$  (TCR–MHC interaction energy),  $E_N$  (threshold for negative selection) and  $E_p$  (threshold for positive selection) for  $M = 10,000$  types of endogenous peptides in thymus.
